# Supplementary material for: A light-inducible organelle-targeting system for dynamically activating and inactivating signaling in budding yeast
Source: PubMed Central journal article supplement — Mol Biol Cell. 2013 Aug 1;24(15):2419–30. doi: 10.1091/mbc.E13-03-0126 (PMC3727934; doi:10.1091/mbc.e13-03-0126), 2013-08-01
Supplement: supp_E13-03-0126v1_CombinedSupMats.pdf [file supp_E13-03-0126v1_CombinedSupMats.pdf]

# Supplemental Materials

*Molecular Biology of the Cell*

Yang et al.

**A**

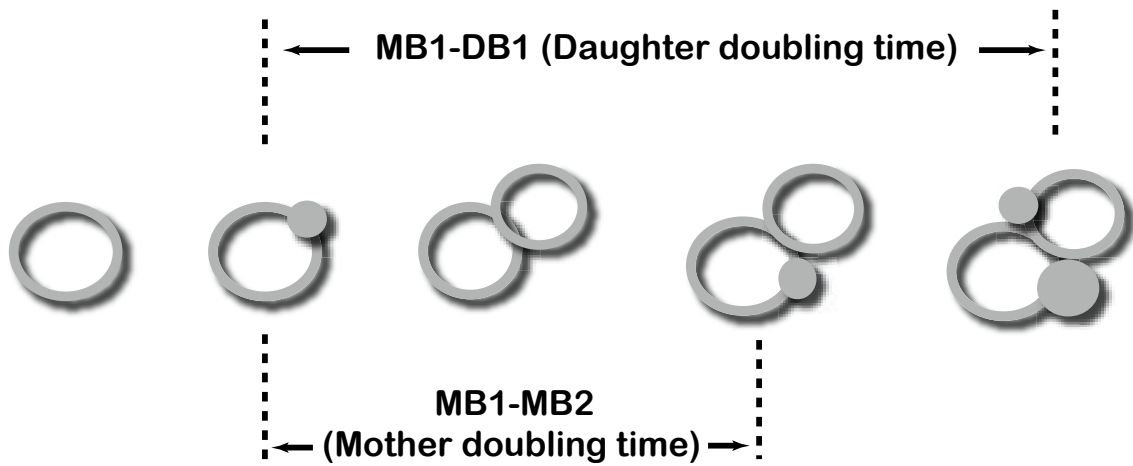

**B**

| Conditions                       |          | Number | Mean (min) | s.d.     |
|----------------------------------|----------|--------|------------|----------|
| Bright field imaging without PCB | Mother   | 44     | 77.45455   | 11.23006 |
|                                  | Daughter | 27     | 100.22222  | 15.00598 |
| Bright field imaging with PCB    | Mother   | 53     | 75.33962   | 11.15786 |
|                                  | Daughter | 41     | 96.95122   | 18.95515 |
| Fluorescence imaging without PCB | Mother   | 46     | 76.8913    | 9.15115  |
|                                  | Daughter | 35     | 101.65714  | 17.04482 |
| Fluorescence imaging with PCB    | Mother   | 48     | 73.875     | 11.47366 |
|                                  | Daughter | 34     | 94.58824   | 18.67281 |

**Supplemental Figure1. No obvious doubling time change was observed upon adding PCB, fluorescence imaging, or both. (A)** Schematic of the doubling time measurement. **(B)** Doubling time in SD medium under different conditions. Data were obtained from 4hrs experiments with a 3min imaging interval. For the fluorescence imaging controls, we used the same exposure time as we used in Clb2 experiments (Green channel: 30ms; Red channel: 50ms.)

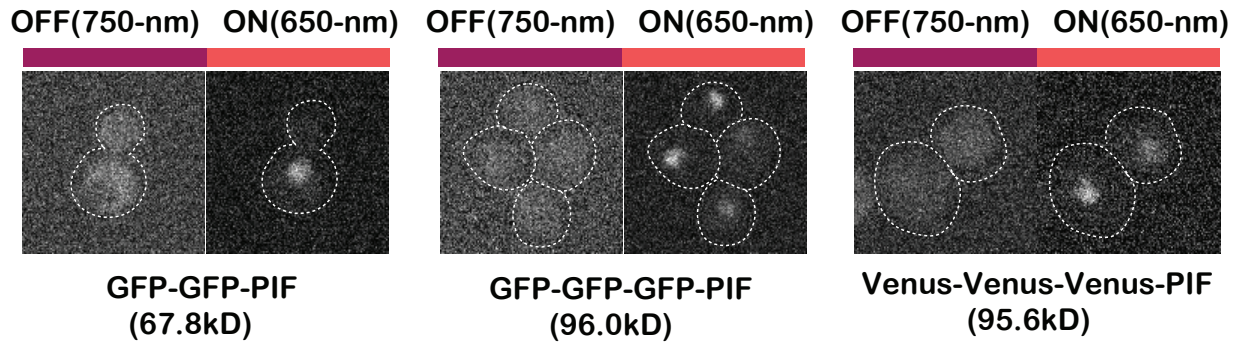

**Supplemental Figure2. Nuclear recruitment (PhyB-HTB2) for high molecular weight proteins.** Cells were exposed to 750 nm light for 3 mins to inactivate recruitment (system is OFF), and then cells were switched to 650 nm for 3min to activate recruitment (system is ON). Fluorescence images show GFP or Venus-tagged PIF proteins, and dashed lines show the cell boundaries.

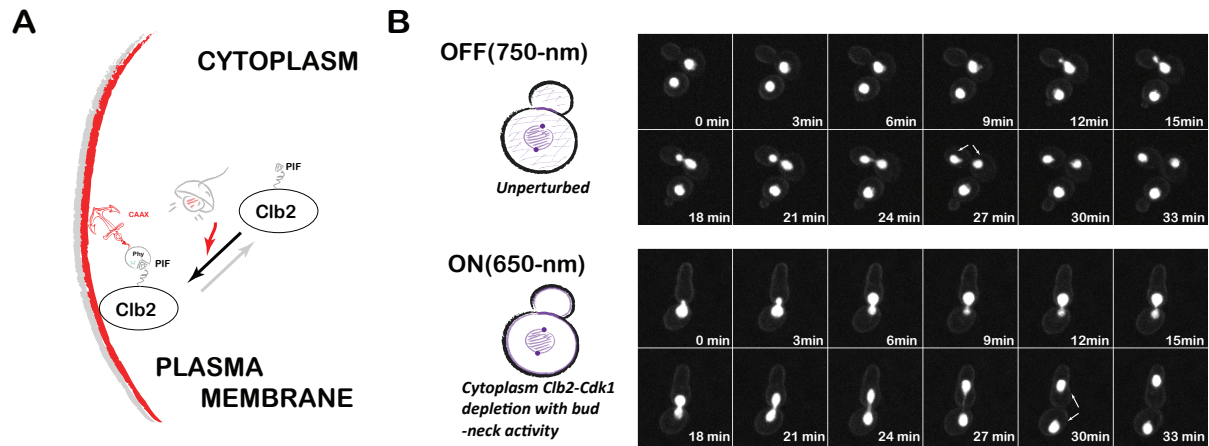

**Supplemental Figure 3. Tethering Clb2 to the plasma membrane does not result in nuclear fission failure.** (A) Schematic of optogenetic nuclear recruitment of Clb2. (B) Sequestering Clb2 to plasma membrane (PhyB-CAAX) results in no nuclear fission defect. Fluorescence time-course images (3 min interval) when Clb2 is not recruited to the plasma membrane (750 nm light; upper panel) versus when Clb2 is recruited to the plasma membrane (with 650 nm light; lower panel). Fluorescence images show the red channel, which contains both PhyB-mCherry-CAAX and HTB2-mCherry.
